# Supplementary material for: Systolic blood pressure and short-term mortality in the emergency department and prehospital setting: a hospital-based cohort study
Source: PubMed Central journal article supplement (PMC4412041; doi:10.1186/s13054-015-0884-y), 2015-04-09

### Emergency Department

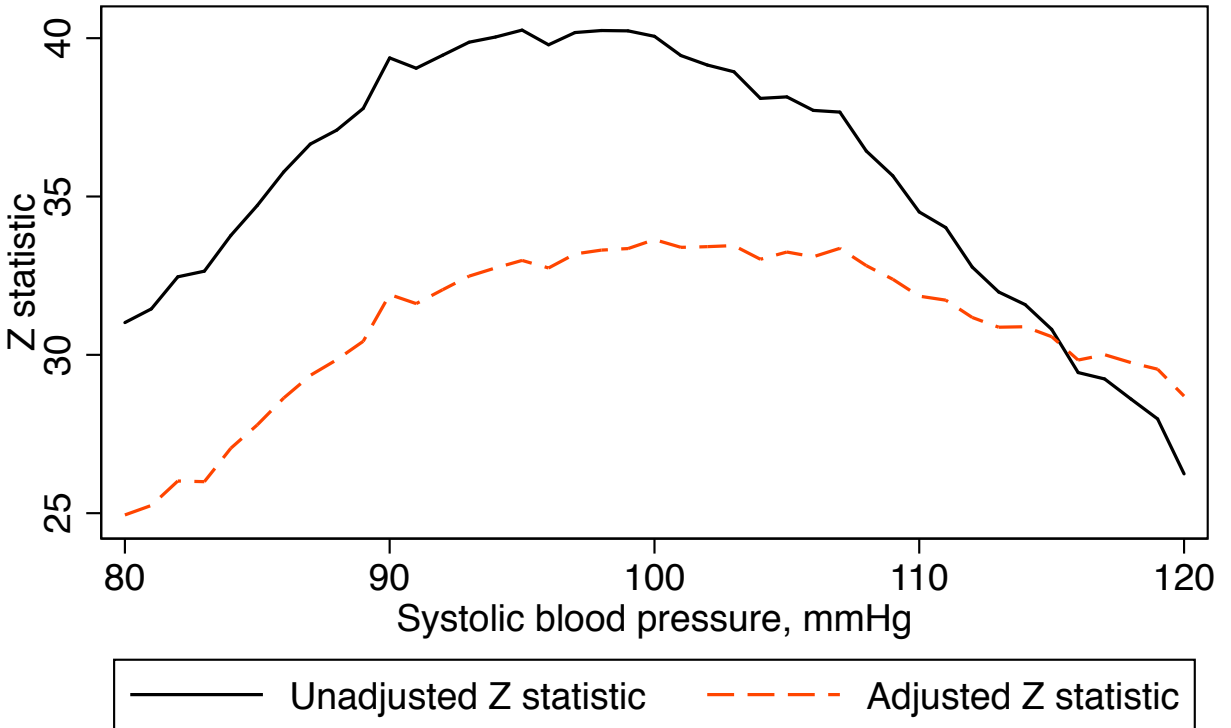

### Ambulance

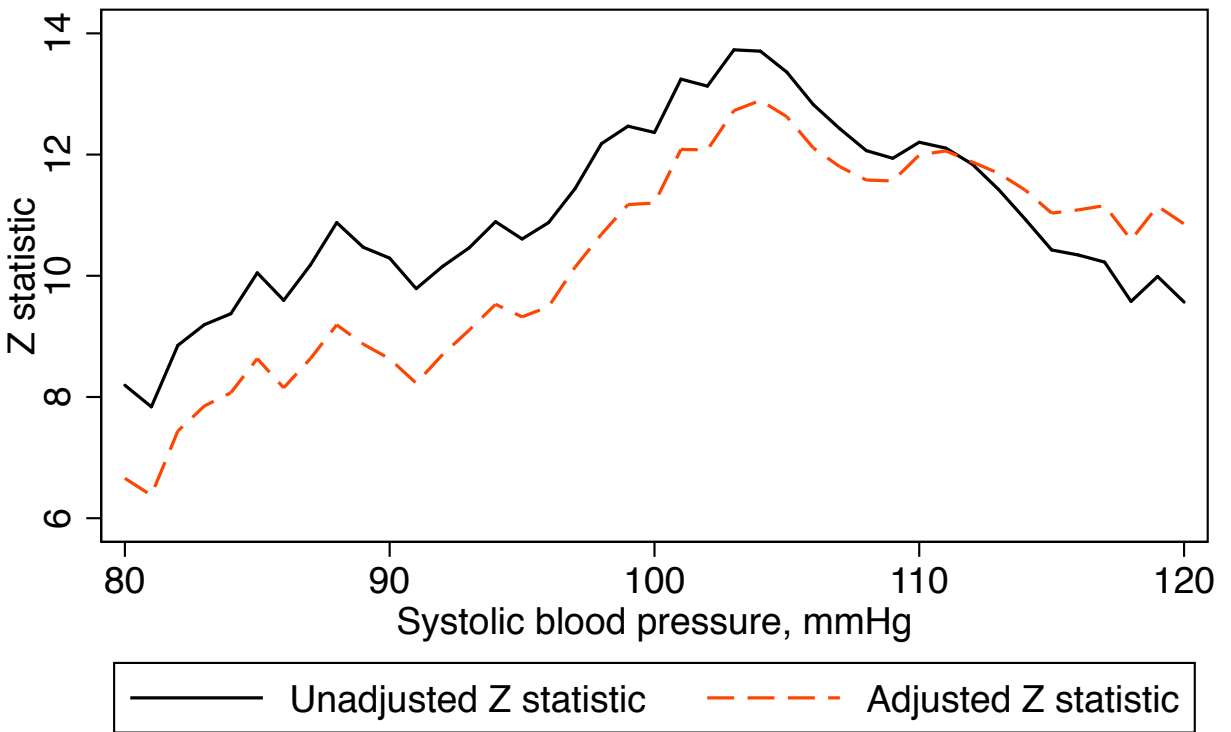

### MECU

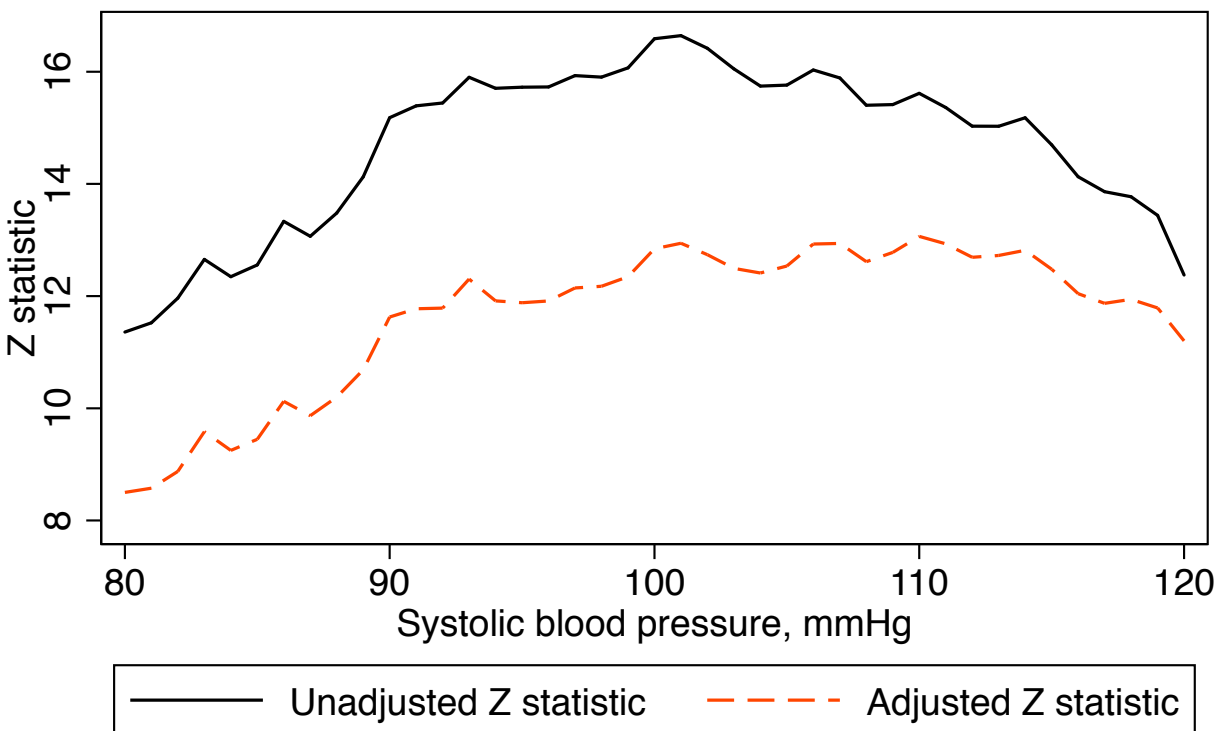

Supplement: 13054_2015_884_MOESM1_ESM.pdf [file 13054_2015_884_MOESM1_ESM.pdf]
